# Supplementary material for: Neutral polymers as coatings for high resolution electrophoretic separation of Aβ peptides on glass microchips
Source: Royal Society of Chemistry journal article supplement (doi:10.1039/c4an01296h), 2014-01-01
Supplement: c4an01296h1.pdf [file c4an01296h1.pdf]

Electronic Supplementary Information

***Neutral polymers as coatings for the high resolution electrophoretic separation of A $\beta$  peptides on glass microchip***

Kiarach Mesbah<sup>a</sup>, Romain Verpillot<sup>a</sup>, Marcella Chiari<sup>b</sup>, Antoine Pallandre<sup>a</sup> and Myriam Taverna<sup>a,†</sup>

<sup>a</sup> Protéines et Nanotechnologies en Sciences Séparatives CNRS UMR 8612, Institut Galien de Paris-Sud, Univ Paris-Sud, Faculté de pharmacie,  
92296 Chatenay-Malabry, France.

<sup>b</sup> Istituto di Chimica del Riconoscimento Molecolare (ICRM) - C.N.R., Via Mario Bianco, 9, 20131 Milano, Italy

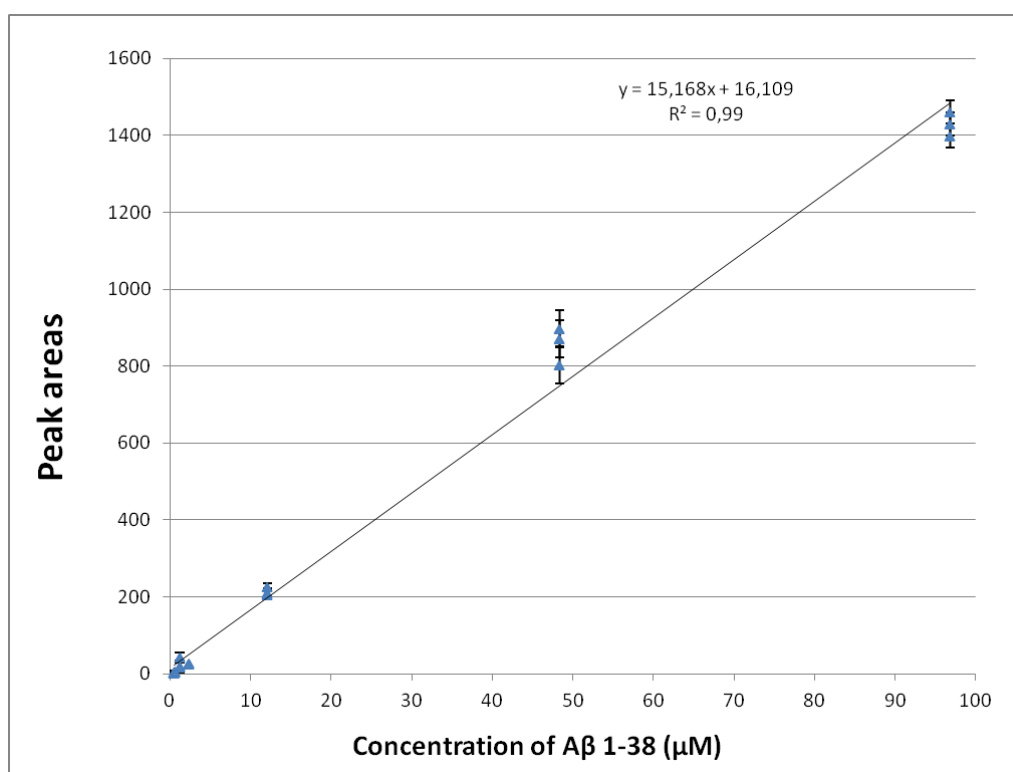

**Figure 1:** Calibration curve of the method, representing the peak area as a function of the concentrations of the A $\beta$  1-38 present in the sample. For each concentration, three analyses were performed. The error bars represent the corresponding standard deviations.

The linearity of the detection was assessed by performing triplicate analyses of A $\beta$  1-38 solutions at concentrations ranging from 0.48 to 100  $\mu$ M. For each of the seven concentrations investigated, the absolute areas were plotted against the concentration.
